# Supplementary material for: Systematic Comparison of Cell Wall-Related Proteins of Different Yeasts
Source: PubMed Central journal article supplement (PMC7916363; doi:10.3390/jof7020128), 2021-02-09
Supplement: jof-07-00128-s001.pdf [file jof-07-00128-s001.pdf]

**Supplementary Table 1.** List of genomes used in the analysis.

| <b>Species</b>                     | <b>Strain</b> | <b>Genbank accession number</b> |
|------------------------------------|---------------|---------------------------------|
| <i>Ashbya aceri</i>                | FM-2008       | GCA_000412225.2                 |
| <i>Candida albicans</i>            | SC5314        | CGD version A22-s07-m01-r125    |
| <i>Candida bracarensis</i>         | CBS 10154     | GCA_001077315.1                 |
| <i>Candida castellii</i>           | CBS 4332      | GCA_001046935.1                 |
| <i>Candida glabrata</i>            | ATCC 2001     | GCA_010111755.1                 |
| <i>Candida nivariensis</i>         | CBS 9983      | GCA_001046915.1                 |
| <i>Debaryomyces hansenii</i>       | CBS767        | GCA_000006445.2                 |
| <i>Eremothecium coryli</i>         | CBS 5749      | GCA_000710315.1                 |
| <i>Eremothecium cymbalariae</i>    | DBVPG 7215    | GCA_000235365.1                 |
| <i>Eremothecium gossypii</i>       | ATCC 10895    | GCA_000091025.4                 |
| <i>Eremothecium sincaudum</i>      | ATCC 58844    | GCA_001548555.1                 |
| <i>Hanseniaspora osmophila</i>     | NRRL Y-1613   | GCA_003707715.1                 |
| <i>Hanseniaspora uvarum</i>        | DSM 2768      | GCA_000968475.1                 |
| <i>Kazachstania aerobia</i>        | NRRL Y-27976  | GCA_003708495.1                 |
| <i>Kazachstania africana</i>       | CBS 2517      | GCA_000304475.1                 |
| <i>Kazachstania bromeliacearum</i> | NRRL Y-48836  | GCA_003708535.2                 |
| <i>Kazachstania intestinalis</i>   | NRRL Y-48847  | GCA_003708845.2                 |
| <i>Kazachstania kunashirensis</i>  | NRRL Y-27209  | GCA_003708465.1                 |
| <i>Kazachstania martiniae</i>      | NRRL Y-409    | GCA_003708925.2                 |
| <i>Kazachstania naganishii</i>     | CBS 8797      | GCA_000348985.1                 |
| <i>Kazachstania rosinii</i>        | NRRL Y-17919  | GCA_003708425.2                 |
| <i>Kazachstania saulgeensis</i>    | CLIB1764      | GCA_900180425.1                 |
| <i>Kazachstania servazzii</i>      | SRCM 102023   | GCA_002214935.1                 |
| <i>Kazachstania siamensis</i>      | NRRL Y-48842  | GCA_003708905.2                 |
| <i>Kazachstania solicola</i>       | NRRL Y-27207  | GCA_003708835.2                 |
| <i>Kazachstania spencerorum</i>    | NRRL Y-17920  | GCA_003708825.2                 |
| <i>Kazachstania taianensis</i>     | NRRL Y-48846  | GCA_003708865.1                 |
| <i>Kazachstania telluris</i>       | UCD 400       | GCA_009394695.1                 |
| <i>Kazachstania transvaalensis</i> | NRRL Y-17245  | GCA_003708445.2                 |
| <i>Kazachstania turicensis</i>     | NRRL Y-48834  | GCA_003708545.1                 |
| <i>Kazachstania unispora</i>       | NRRL Y-1556   | GCA_003708525.2                 |
| <i>Kazachstania viticola</i>       | NRRL Y-27206  | GCA_003708455.1                 |
| <i>Kazachstania yakushimaensis</i> | NRRL Y-48837  | GCA_003709265.1                 |
| <i>Kluyveromyces aestuarii</i>     | NRRL YB-4510  | GCA_003707555.1                 |
| <i>Kluyveromyces dobzhanskii</i>   | NRRL Y-1974   | GCA_003705805.2                 |
| <i>Kluyveromyces lactis</i>        | NRRL Y-1140   | GCA_000002515.1                 |
| <i>Kluyveromyces marxianus</i>     | NBRC 1777     | GCA_001417835.1                 |
| <i>Kluyveromyces nonfermentans</i> | NRRL Y-27343  | GCA_003670155.1                 |
| <i>Kluyveromyces wickerhamii</i>   | UCD 54-210    | GCA_000179415.1                 |
| <i>Komagataella pastoris</i>       | ATCC 28485    | GCA_001708105.1                 |

|                                                          |              |                               |
|----------------------------------------------------------|--------------|-------------------------------|
| <i>Lachancea dasiensis</i>                               | CBS 10888    | GCA_900074725.1               |
| <i>Lachancea fermentati</i>                              | CBS 6772     | GCA_900074765.1               |
| <i>Lachancea kluyveri</i>                                | NRRL Y-12651 | GCA_000149225.1               |
| <i>Lachancea lanzarotensis</i>                           | CBS 12615    | GCA_000938715.1               |
| <i>Lachancea meyersii</i>                                | CBS 8951     | GCA_900074715.1               |
| <i>Lachancea mirantina</i>                               | CBS 11717    | GCA_900074745.1               |
| <i>Lachancea nothofagi</i>                               | CBS 11611    | GCA_900074755.1               |
| <i>Lachancea quebecensis</i>                             | CBS 14088    | GCA_002900925.1               |
| <i>Lachancea thermotolerans</i>                          | CBS 6340     | GCA_000142805.1               |
| <i>Lachancea waltii</i>                                  | NCYC 2644    | GCA_000167115.1               |
| <i>Metschnikowia bicuspidata</i> var. <i>bicuspidata</i> | NRRL YB-4993 | GCA_001664035.1               |
| <i>Metschnikowia pulcherrima</i>                         | Bath1        | GCA_009932455.1               |
| <i>Metschnikowia reukaufii</i>                           | MR1          | GCA_003401635.1               |
| <i>Nakaseomyces bacillisporus</i>                        | CBS 7720     | GCA_001046975.1               |
| <i>Nakaseomyces delphensis</i>                           | CBS 2170     | GCA_001039675.1               |
| <i>Naumovozyma castellii</i>                             | CBS 4309     | GCA_000237345.1               |
| <i>Naumovozyma dairenensis</i>                           | CBS 421      | GCA_000227115.2               |
| <i>Pichia kudriavzevii</i>                               | CBS5147      | GCA_003054405.1               |
| <i>Pichia membranifaciens</i>                            | NRRL Y-2026  | GCA_001661235.1               |
| <i>Saccharomyces cerevisiae</i>                          | S288C        | SGD version: R64-2-1_20150113 |
| <i>Saccharomyces arboricola</i>                          | H-6          | GCA_000292725.1               |
| <i>Saccharomyces eubayanus</i>                           | CBS 12357    | GCA_003327605.1               |
| <i>Saccharomyces jurei</i>                               | NCYC 3947    | GCA_900290405.1               |
| <i>Saccharomyces kudriavzevii</i>                        | CR 85        | GCA_003327635.1               |
| <i>Saccharomyces mikatae</i>                             | IFO 1815     | GCA_000166975.1               |
| <i>Saccharomyces paradoxus</i>                           | CBS 432      | GCA_002079055.1               |
| <i>Saccharomyces</i> sp. ' <i>boulardii</i> '            | biocodex     | GCA_001298375.2               |
| <i>Saccharomyces uvarum</i>                              | U3           | GCA_002242645.1               |
| <i>Schizosaccharomyces japonicus</i>                     | yFS275       | GCA_000149845.2               |
| <i>Schizosaccharomyces pombe</i>                         | 972h-        | GCA_000002945.2               |
| <i>Tetrapisispora blattae</i>                            | CBS 6284     | GCA_000315915.1               |
| <i>Tetrapisispora fleetii</i>                            | NRRL Y-27350 | GCA_003707605.1               |
| <i>Tetrapisispora iriomotensis</i>                       | NRRL Y-27309 | GCA_003705975.1               |
| <i>Tetrapisispora namnaoensis</i>                        | NRRL Y-27982 | GCA_003705985.1               |
| <i>Tetrapisispora phaffii</i>                            | CBS 4417     | GCA_000236905.1               |
| <i>Torulaspora delbrueckii</i>                           | COFT1        | GCA_003013175.1               |
| <i>Torulaspora franciscaae</i>                           | NRRL Y-17532 | GCA_003705175.2               |
| <i>Torulaspora maleeae</i>                               | CBS 10694    | GCA_003708055.2               |
| <i>Torulaspora microellipsoides</i>                      | NRRL Y-1549  | GCA_003707085.1               |
| <i>Torulaspora pretoriensis</i>                          | CBS 2187     | GCA_012851205.1               |
| <i>Vanderwaltozyma polyspora</i>                         | DSM 70294    | GCA_000150035.1               |
| <i>Wickerhamomyces anomalus</i>                          | NRRL Y-366-8 | GCA_001661255.1               |

|                                        |              |                 |
|----------------------------------------|--------------|-----------------|
| <i>Yarrowia lipolytica</i>             | DSM 3286     | GCA_014490615.1 |
| <i>Yueomyces sinensis</i>              | NRRL Y-17406 | GCA_003707995.1 |
| <i>Zygosaccharomyces bailii</i>        | IST 302      | GCA_900162805.1 |
| <i>Zygosaccharomyces bisporus</i>      | NRRL Y-12626 | GCA_003707595.1 |
| <i>Zygosaccharomyces kombuchaensis</i> | NRRL YB-4811 | GCA_003705955.1 |
| <i>Zygosaccharomyces mellis</i>        | Ca-7         | GCA_005406105.1 |
| <i>Zygosaccharomyces rouxii</i>        | CBS 732      | GCA_000026365.1 |
| <i>Zygorulasporea florentina</i>       | NRRL Y-1560  | GCA_003671575.2 |
| <i>Zygorulasporea mrakii</i>           | NRRL Y-12654 | GCA_003671565.1 |

**Supplementary Table 2.** List of strains used in labelling and detection of cell wall proteins

| Species                              | Strain designation  |                       | Source                                                                                |
|--------------------------------------|---------------------|-----------------------|---------------------------------------------------------------------------------------|
|                                      | ACBR                | CBS                   |                                                                                       |
| <i>Blastobotrys adenivorans</i>      | HA1092 <sup>T</sup> | CBS8244 <sup>T</sup>  | Soil, Netherlands, Wageningen                                                         |
| <i>Debaryomyces hansenii</i>         | HA574               | -                     | Excrement of birds in a zoo                                                           |
| <i>D. vindobonensis</i>              | HA1076 <sup>T</sup> | CBS11666 <sup>T</sup> | Wastewater treatment plant, Austria, Vienna                                           |
| <i>Hanseniaspora osmophila</i>       | HA1225              | CBS314 <sup>T</sup>   | Muscatel grape, Russia, Crimea                                                        |
| <i>H. uvarum</i>                     | HA1216 <sup>T</sup> |                       |                                                                                       |
| <i>Kluyveromyces lactis</i>          | HA118               | CBS2359               | creamery, USA                                                                         |
| <i>K. marxianus</i>                  | HA731 <sup>T</sup>  | CBS834 <sup>T</sup>   | kefyr grain, Netherlands                                                              |
| <i>Metschnikowia biscupidata</i>     | HA672 <sup>NT</sup> | CBS5575 <sup>NT</sup> | sporocysts of <i>Diplostomum flexicaudum</i> (trematode), in digestive gland of snail |
| <i>M. pulcherrima</i>                | HA665 <sup>T</sup>  | CBS5833 <sup>T</sup>  | Berries of <i>Vitis labrusca</i> ; USA, California                                    |
| <i>M. reukaufii</i>                  | HA666 <sup>T</sup>  | CBS 5834 <sup>T</sup> | Flower of <i>Epilobium angustifolium</i> , Canada                                     |
| <i>Pichia kudriavzevii</i>           | HA892 <sup>T</sup>  | CBS5147 <sup>T</sup>  | fruit juice                                                                           |
| <i>P. membranifaciens</i>            | HA895 <sup>T</sup>  | CBS107 <sup>T</sup>   | unknown                                                                               |
| <i>S. cerevisiae</i>                 | HA2779              | -                     | BY4741, derivative of S288C strain                                                    |
| <i>S. cerevisiae v. boulardii</i>    | HA282               | CBS5926               | Fruit, Indochina                                                                      |
| <i>S. paradoxus</i>                  | HA390               | CBS406                | Exudate of <i>Quercus</i> sp., Netherlands                                            |
| <i>Schizosaccharomyces japonicus</i> | HA116 <sup>T</sup>  | CBS103 <sup>T</sup>   | concentrated grape juice, USA                                                         |
| <i>Sch.pombe</i>                     | HA983 <sup>T</sup>  | CBS357 <sup>T</sup>   | cane-sugar molasses, for rum making, Jamaica                                          |
| <i>Torulasporea delbrueckii</i>      | HA688 <sup>NT</sup> | CBS1146 <sup>NT</sup> | unknown                                                                               |
| <i>Yarrowia lipolytica</i>           | HA990 <sup>T</sup>  | CBS6124 <sup>T</sup>  | maize processing plant; USA, Illinois                                                 |
| <i>Y. lipolytica</i>                 | HA826               | -                     | surface ripened soft cheese, Austria                                                  |

T, type strain; NT, neotype strain; ACBR, Austrian Center of Biological Resources and Applied Mycology, Muthgasse 11, 1190 Vienna, Austria; CBS, CBS-KNAW Fungal Biodiversity Centre, Uppsalalaan 8, 3584 CT Utrecht, The Netherlands
